# Supplementary material
Source: MDPI journal article supplement (https://www.mdpi.com/2304-6740/6/2/41)

# checkCIF/PLATON report

Structure factors have been supplied for datablock(s) shelx

THIS REPORT IS FOR GUIDANCE ONLY. IF USED AS PART OF A REVIEW PROCEDURE FOR PUBLICATION, IT SHOULD NOT REPLACE THE EXPERTISE OF AN EXPERIENCED CRYSTALLOGRAPHIC REFEREE.

No syntax errors found.      CIF dictionary      Interpreting this report

## Datablock: shelx

---

Bond precision:    Bi- O = 0.0719 A                      Wavelength=0.71073

Cell:                      a=5.5119(1)              b=5.5119(1)              c=29.0984(14)  
                            alpha=90              beta=90              gamma=90  
Temperature:              295 K

|                | Calculated         | Reported     |
|----------------|--------------------|--------------|
| Volume         | 884.04(5)          | 884.04(5)    |
| Space group    | P 21 c n           | P 21 c n     |
| Hall group     | P -2n 2a           | P -2n 2a     |
| Moiety formula | Bi8 Nb2 O16, 2(Br) | Bi4 Br Nb O8 |
| Sum formula    | Bi8 Br2 Nb2 O16    | Bi4 Br Nb O8 |
| Mr             | 2273.46            | 1136.74      |
| Dx,g cm-3      | 8.541              | 8.541        |
| Z              | 2                  | 4            |
| Mu (mm-1)      | 85.150             | 85.150       |
| F000           | 1888.0             | 1888.0       |
| F000'          | 1820.83            |              |
| h,k,lmax       | 6,6,36             | 6,6,36       |
| Nref           | 1798[ 995]         | 1978         |
| Tmin,Tmax      | 0.002,0.154        | 0.011,0.227  |
| Tmin'          | 0.000              |              |

Correction method= # Reported T Limits: Tmin=0.011 Tmax=0.227  
AbsCorr = GAUSSIAN

Data completeness= 1.99/1.10                      Theta(max)= 26.359

R(reflections)= 0.0850( 1681)                      wR2(reflections)= 0.2488( 1978)

S = 1.179                      Npar= 53

---

The following ALERTS were generated. Each ALERT has the format

**test-name\_ALERT\_alert-type\_alert-level.**

Click on the hyperlinks for more details of the test.

---

### Alert level A

ATOM007\_ALERT\_1\_A \_atom\_site\_aniso\_label is missing  
Unique label identifying the atom site.

---

### Alert level B

DIFMN02\_ALERT\_2\_B The minimum difference density is < -0.1\*ZMAX\*1.00  
\_refine\_diff\_density\_min given = -12.094  
Test value = -8.300  
SYMMS02\_ALERT\_1\_B The unit-cell lengths a and b should not be equal for an  
orthorhombic cell  
Cell 5.5119 5.5119 29.0984  
Angles 90.0000 90.0000 90.0000  
PLAT097\_ALERT\_2\_B Large Reported Max. (Positive) Residual Density 11.45 eA-3  
PLAT098\_ALERT\_2\_B Large Reported Min. (Negative) Residual Density -12.09 eA-3  
PLAT113\_ALERT\_2\_B ADDSYM Suggests Possible Pseudo/New Space Group Ima2 Check  
Note: (Pseudo) Lattice Translation Implemented

---

### Alert level C

DIFMN03\_ALERT\_1\_C The minimum difference density is < -0.1\*ZMAX\*0.75  
The relevant atom site should be identified.  
DIFMX02\_ALERT\_1\_C The maximum difference density is > 0.1\*ZMAX\*0.75  
The relevant atom site should be identified.  
PLAT034\_ALERT\_1\_C No Flack Parameter Given. Z > Si, NonCentro .... Please Do !  
PLAT202\_ALERT\_3\_C Isotropic non-H Atoms in Anion/Solvent ..... 1 Check  
PLAT790\_ALERT\_4\_C Centre of Gravity not Within Unit Cell: Resd. # 1 Note  
Bi8 Nb2 O16

---

### Alert level G

PLAT004\_ALERT\_5\_G Polymeric Structure Found with Maximum Dimension 2 Info  
PLAT042\_ALERT\_1\_G Calc. and Reported MoietyFormula Strings Differ Please Check  
PLAT045\_ALERT\_1\_G Calculated and Reported Z Differ by a Factor ... 0.50 Check  
PLAT072\_ALERT\_2\_G SHELXL First Parameter in WGHT Unusually Large 0.10 Report  
PLAT083\_ALERT\_2\_G SHELXL Second Parameter in WGHT Unusually Large 283.58 Why ?  
PLAT110\_ALERT\_2\_G ADDSYM Detects Potential Lattice Translation ... ? Check  
PLAT112\_ALERT\_2\_G ADDSYM Detects New (Pseudo) Symm. Elem I 100 %Fit  
PLAT171\_ALERT\_4\_G The CIF-Embedded .res File Contains EADP Records 1 Report  
PLAT794\_ALERT\_5\_G Tentative Bond Valency for Nb1 (V) . 5.48 Info  
PLAT870\_ALERT\_4\_G ALERTS Related to Twinning Effects Suppressed .. ! Info  
PLAT898\_ALERT\_4\_G Second Reported H-M Symbol in CIF Ignored ..... ! Check  
PLAT910\_ALERT\_3\_G Missing # of FCF Reflection(s) Below Theta(Min). 1 Note  
PLAT931\_ALERT\_5\_G Found Twin Law ( 1 1 0 ) [ ] Est. BASF 0.52 Check  
PLAT931\_ALERT\_5\_G Found Twin Law ( ) [ 1 1 0 ] Est. BASF 0.52 Check

---

1 **ALERT level A** = Most likely a serious problem - resolve or explain  
5 **ALERT level B** = A potentially serious problem, consider carefully  
5 **ALERT level C** = Check. Ensure it is not caused by an omission or oversight  
14 **ALERT level G** = General information/check it is not something unexpected

7 ALERT type 1 CIF construction/syntax error, inconsistent or missing data  
8 ALERT type 2 Indicator that the structure model may be wrong or deficient  
2 ALERT type 3 Indicator that the structure quality may be low  
4 ALERT type 4 Improvement, methodology, query or suggestion  
4 ALERT type 5 Informative message, check

---

It is advisable to attempt to resolve as many as possible of the alerts in all categories. Often the minor alerts point to easily fixed oversights, errors and omissions in your CIF or refinement strategy, so attention to these fine details can be worthwhile. In order to resolve some of the more serious problems it may be necessary to carry out additional measurements or structure refinements. However, the purpose of your study may justify the reported deviations and the more serious of these should normally be commented upon in the discussion or experimental section of a paper or in the "special\_details" fields of the CIF. checkCIF was carefully designed to identify outliers and unusual parameters, but every test has its limitations and alerts that are not important in a particular case may appear. Conversely, the absence of alerts does not guarantee there are no aspects of the results needing attention. It is up to the individual to critically assess their own results and, if necessary, seek expert advice.

### **Publication of your CIF in IUCr journals**

A basic structural check has been run on your CIF. These basic checks will be run on all CIFs submitted for publication in IUCr journals (*Acta Crystallographica*, *Journal of Applied Crystallography*, *Journal of Synchrotron Radiation*); however, if you intend to submit to *Acta Crystallographica Section C* or *E* or *IUCrData*, you should make sure that full publication checks are run on the final version of your CIF prior to submission.

### **Publication of your CIF in other journals**

Please refer to the *Notes for Authors* of the relevant journal for any special instructions relating to CIF submission.

---

**PLATON version of 30/01/2018; check.def file version of 30/01/2018**

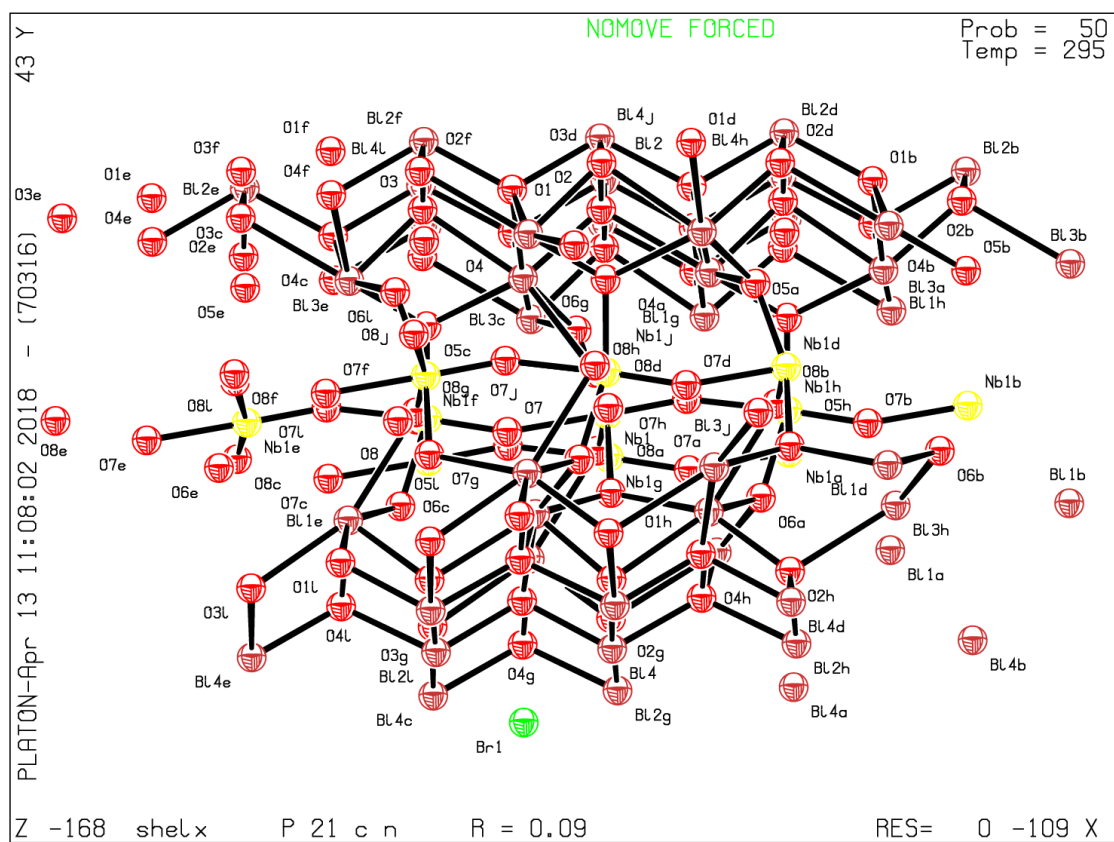

Supplement: s1 [file s1]
