# Supplementary material
Source: MDPI journal article supplement (https://www.mdpi.com/2304-6740/6/2/41)
Supplement: s1 [file s1]

# Supplementary Materials: Single crystal growth of Sillén–Aurivillius perovskite oxyhalides $\text{Bi}_4\text{NbO}_8\text{X}$ ( $\text{X} = \text{Cl}, \text{Br}$ )

Chengchao Zhong, Daichi Kato, Fumitaka Takeiri, Emily Nishiwaki, Kotaro Fujii, Masatomo Yashima, Yasuhiro Fujii, Akitoshi Koreeda, Cédric Tassel, Ryu Abe and Hiroshi Kageyama

## Contents

**Figure S1.** Powder XRD of obtained product when using reported condition.

**Figure S2.** A picture of obtained product with grey agglomerate and yellow crystalline mass.

**Figure S3.** EDX spectrum of a (a)  $\text{Bi}_4\text{NbO}_8\text{Cl}$  and (b)  $\text{Bi}_4\text{NbO}_8\text{Br}$  crystal.

**Table S1.** Refined structural parameters for  $\text{Bi}_4\text{NbO}_8\text{Cl}$  at 293 K in the space group  $P2_1cn$ .

**Table S2.** Selected bond lengths and angles for  $\text{Bi}_4\text{NbO}_8\text{Cl}$ .

**Table S3.** Calculated bond valence sum values of  $\text{Bi}_4\text{NbO}_8\text{Cl}$ .

**Figure S4.** Polarized Raman spectra of  $\text{Bi}_4\text{NbO}_8\text{Cl}$  in cross nicol geometries.

**Figure S5.** Reciprocal lattice plane of  $\text{Bi}_4\text{NbO}_8\text{Br}$ .

**Table S4.** Refined structural parameters for  $\text{Bi}_4\text{NbO}_8\text{Br}$  at 293 K in the space group  $P2_1cn$ .

**Table S5.** Selected bond lengths and angles for  $\text{Bi}_4\text{NbO}_8\text{Br}$ .

**Table S6.** Crystallographic data for  $\text{Bi}_4\text{NbO}_8\text{Cl}$  and  $\text{Bi}_4\text{NbO}_8\text{Br}$

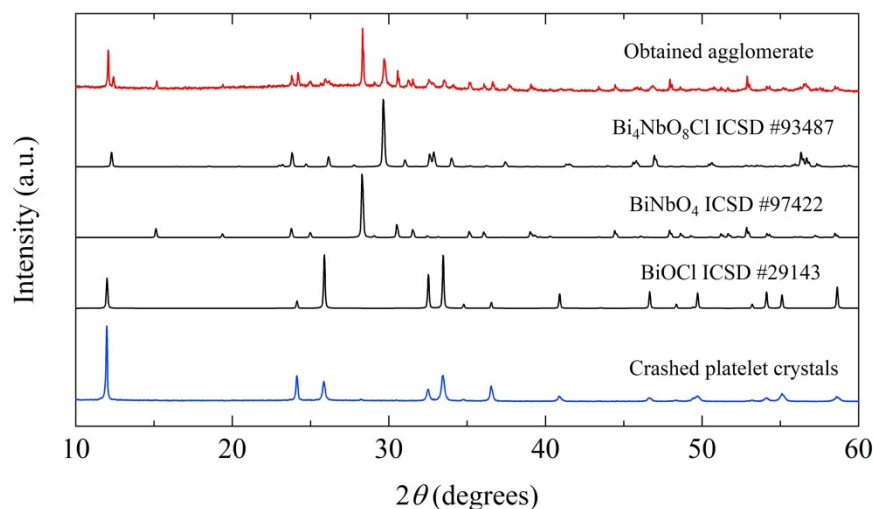

**Figure S1.** Powder XRD of obtained product when using reported condition (red line) and peak data of  $\text{Bi}_4\text{NbO}_8\text{Cl}$ ,  $\text{BiOCl}$ ,  $\text{BiNbO}_4$  from ICSD database.

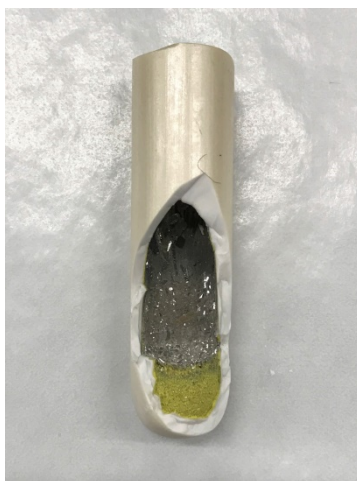

Figure S2. A picture of obtained product. The grey agglomerate is  $\text{BiNbO}_4$  attached with transparent platelet single crystal of  $\text{BiOCl}$  on it. The yellow crystalline mass is  $\text{Bi}_4\text{NbO}_8\text{Cl}$ .

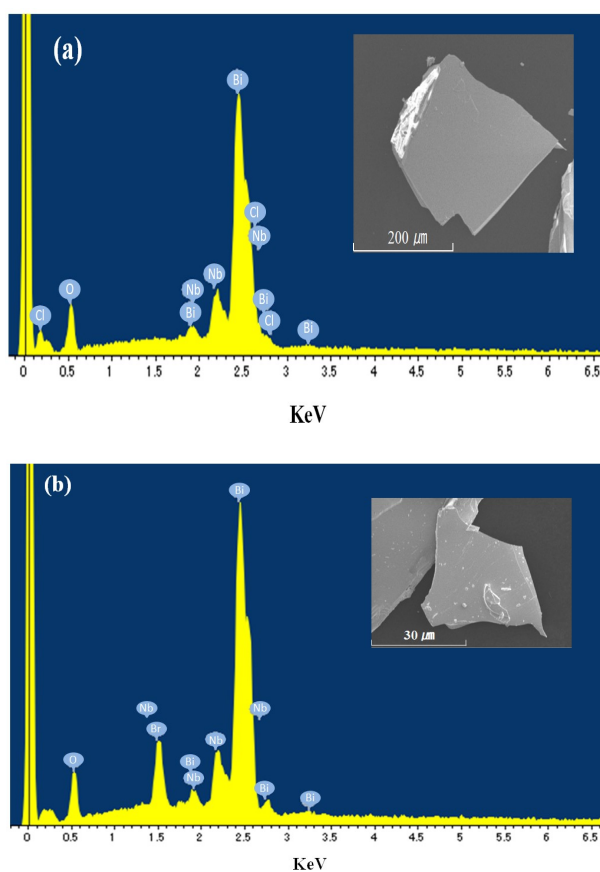

Figure S3. EDX spectrum of (a)  $\text{Bi}_4\text{NbO}_8\text{Cl}$  and (b)  $\text{Bi}_4\text{NbO}_8\text{Br}$  crystal. The inset shows the crystal in backscattered electron (BSE) mode, highlighting elemental contrast.

**Table S1.** Refined structural parameters for Bi<sub>4</sub>NbO<sub>8</sub>Cl at 293 K in the space group *P2<sub>1</sub>cn*. Lattice parameters: *a* = 5.4835(3) Å, *b* = 5.4850(3) Å, *c* = 28.682(2) Å.

| Atom  | <i>x</i>    | <i>y</i>   | <i>z</i>    | <i>U</i> <sub>iso</sub> (× 100, Å <sup>2</sup> ) |
|-------|-------------|------------|-------------|--------------------------------------------------|
| Nb(1) | −0.0056(16) | 0.2509(8)  | 0.2498(2)   | 0.83(5)                                          |
| Bi(1) | 0           | 0.7901(5)  | 0.15930(8)  | <i>U</i> <sub>eq</sub> = 1.50(5) <sup>a</sup>    |
| Bi(2) | 0.0021(6)   | 0.2447(4)  | 0.42887(9)  | 0.83(4)                                          |
| Bi(3) | −0.0405(6)  | 0.7509(4)  | 0.34088(10) | <i>U</i> <sub>eq</sub> = 1.56(6) <sup>a</sup>    |
| Bi(4) | −0.0156(6)  | 0.2646(4)  | 0.07119(9)  | <i>U</i> <sub>eq</sub> = 1.35(6) <sup>a</sup>    |
| Cl(1) | 0.508(4)    | 0.2492(12) | 0.0002(3)   | 2.51(19)                                         |
| O(1)  | 0.750(10)   | 0.485(11)  | 0.3903(17)  | 1.06(16) <sup>b</sup>                            |
| O(2)  | 0.262(5)    | 0.512(11)  | 0.3931(17)  | 1.06(16)                                         |
| O(3)  | 0.754(5)    | 0.003(12)  | 0.3898(17)  | 1.06(16)                                         |
| O(4)  | 0.235(5)    | 0.004(12)  | 0.3906(18)  | 1.06(16)                                         |
| O(5)  | 0.566(5)    | 0.659(12)  | 0.316(2)    | 1.06(16)                                         |
| O(6)  | 0.403(6)    | 0.839(12)  | 0.185(2)    | 1.06(16)                                         |
| O(7)  | 0.274(5)    | −0.034(13) | 0.261(2)    | 1.06(16)                                         |
| O(8)  | 0.772(5)    | 0.004(12)  | 0.264(2)    | 1.06(16)                                         |

<sup>a</sup>Anisotropic displacement parameters were refined for Bi(1), Bi(2), and Bi(4).<sup>b</sup>A common isotropic atomic displacement parameter was refined for oxygen atoms.**Table S2.** Selected bond lengths (Å) and angles (°) for Bi<sub>4</sub>NbO<sub>8</sub>Cl (I: this work; II: Lightfoot [19]).

|             | I       | II      |
|-------------|---------|---------|
| Nb(1)–O(5)  | 1.87(3) | 2.05(2) |
| Nb(1)–O(6)  | 2.06(3) | 1.96(3) |
| Nb(1)–O(7)  | 2.11(3) | 2.01(2) |
|             | 1.86(3) | 1.97(2) |
| Nb(1)–O(8)  | 2.24(3) | 2.02(2) |
|             | 1.78(3) | 1.94(2) |
| Bi(1)–O(1)  | 2.21(3) | 2.37(2) |
| Bi(1)–O(2)  | 2.33(3) | 2.27(2) |
| Bi(1)–O(3)  | 2.69(3) | 2.71(2) |
| Bi(1)–O(4)  | 2.56(3) | 2.58(2) |
| Bi(1)–O(5)  | 2.24(3) | 2.21(1) |
| Bi(1)–O(6)  | 2.36(4) | 2.38(3) |
| Bi(1)–O(7)  | 3.07(3) | 3.02(2) |
| Bi(1)–O(8)  | 2.76(3) | 3.22(3) |
| Bi(2)–Cl(1) | 3.35(1) | 3.25(2) |
|             | 3.31(3) | 3.40(2) |
|             | 3.37(3) | 3.45(2) |
|             | 3.41(1) | 3.32(2) |
| Bi(2)–O(1)  | 2.17(3) | 2.21(2) |
| Bi(2)–O(2)  | 2.2(3)  | 2.18(2) |
| Bi(2)–O(3)  | 2.25(3) | 2.29(2) |
| Bi(2)–O(4)  | 2.22(3) | 2.27(2) |
| Bi(3)–O(1)  | 2.54(3) | 2.52(2) |
| Bi(3)–O(2)  | 2.82(3) | 2.56(2) |
| Bi(3)–O(3)  | 2.18(3) | 2.31(2) |
| Bi(3)–O(4)  | 2.35(3) | 2.32(2) |
| Bi(3)–O(5)  | 2.43(3) | 2.36(2) |
| Bi(3)–O(6)  | 2.37(3) | 3.04(3) |
|             | 3.31(3) | 2.67(3) |

|                  |         |         |
|------------------|---------|---------|
| Bi(3)-O(7)       | 3.03(3) | 2.94(2) |
| Bi(3)-O(8)       | 3.14(2) | 2.86(3) |
| Bi(4)-Cl(1)      | 3.37(3) | 3.38(2) |
|                  | 3.29(1) | 3.37(2) |
|                  | 3.48(3) | 3.32(2) |
|                  | 3.39(1) | 3.39(1) |
| Bi(4)-O(1)       | 2.38(3) | 2.17(2) |
| Bi(4)-O(2)       | 2.09(3) | 2.24(2) |
| Bi(4)-O(3)       | 2.23(3) | 2.17(2) |
| Bi(4)-O(4)       | 2.31(3) | 2.24(2) |
| O(5)-Nb(1)-O(6)  | 161(1)  | 172(1)  |
| O(5)-Nb(1)-O(7)  | 83(1)   | 82(1)   |
|                  | 95(1)   | 100(1)  |
| O(5)-Nb(1)-O(8)  | 79(1)   | 82(1)   |
|                  | 94(1)   | 96(1)   |
| O(6)-Nb(1)-O(7)  | 86(1)   | 94(1)   |
|                  | 97(1)   | 87(1)   |
| O(6)-Nb(1)-O(8)  | 84(1)   | 89(1)   |
|                  | 97(1)   | 91(1)   |
| O(7)-Nb(1)-O(7)  | 174(1)  | 165(1)  |
| O(7)-Nb(1)-O(8)  | 71(1)   | 89(1)   |
|                  | 83(1)   | 72(1)   |
|                  | 103(1)  | 106(1)  |
|                  | 103(1)  | 93(1)   |
| O(8)-Nb(1)-O(8)  | 153(1)  | 161(1)  |
| Nb(1)-O(7)-Nb(1) | 156(1)  | 152(3)  |
| Nb(1)-O(8)-Nb(1) | 156(1)  | 156(4)  |

**Table S3.** Calculated bond valence sum values of I (this work), II (Lightfoot<sup>19</sup>) and III (Ackerman<sup>9</sup>). Valence parameter of  $R_o$  and  $B$  are from Brown and Altermatt (1985), Acta Cryst. B41, 244-247.

| Atom  | I    | II   | III  |
|-------|------|------|------|
| Nb(1) | 5.35 | 4.84 | 5.26 |
| Bi(1) | 3.14 | 2.91 | 3.20 |
| Bi(2) | 3.31 | 3.16 | 2.90 |
| Bi(3) | 2.79 | 2.73 | 5.23 |
| Bi(4) | 3.08 | 3.39 | 3.39 |
| Cl(1) | 0.73 | 0.75 | 0.85 |
| O(1)  | 2.31 | 2.34 | 2.54 |
| O(2)  | 2.43 | 2.38 | 2.79 |
| O(3)  | 2.34 | 2.15 | 2.85 |
| O(4)  | 2.05 | 2.10 | 2.51 |
| O(5)  | 2.19 | 1.94 | 2.15 |
| O(6)  | 1.63 | 1.69 | 3.27 |
| O(7)  | 1.88 | 1.76 | 1.82 |
| O(8)  | 2.06 | 1.83 | 1.20 |

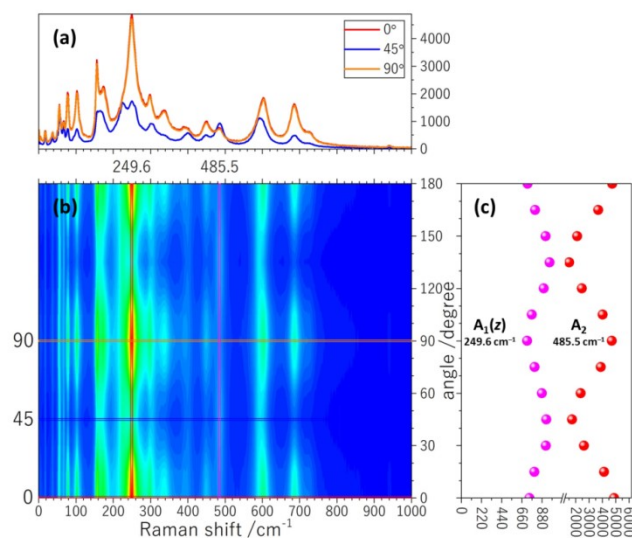

**Figure S4.** (a) Raman spectra obtained in cross nicol geometries in a spectral range from 0 to 1000  $\text{cm}^{-1}$ . (b) Contour plots of angular dependences of the polarized Raman intensity. (c) Angular dependence of integrated Raman intensities of  $A_1(z)$  modes (pink), and  $A_2$  modes (red).

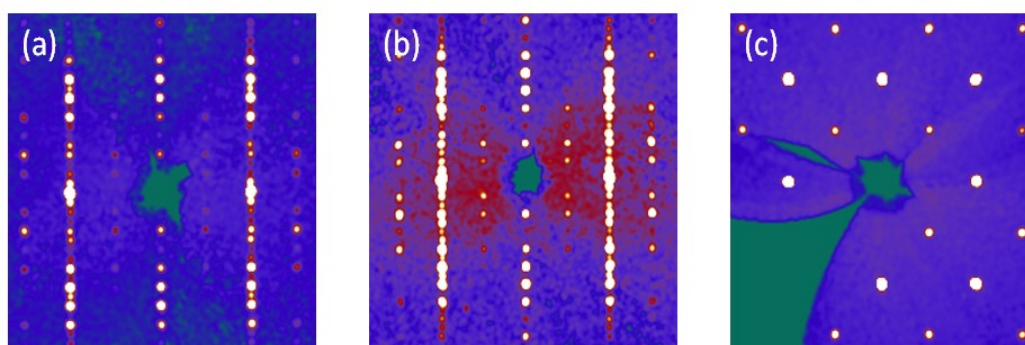

**Figure S5.** Reciprocal lattice plane of (a)  $0kl$  (b)  $h0l$ , and (c)  $hk0$  reconstructed from raw single crystal diffraction data.

**Table S4.** Refined structural parameters for  $\text{Bi}_4\text{NbO}_8\text{Br}$  at 293 K in the space group  $P2_1cn$ . Lattice parameters:  $a = 5.51190(10)$  Å,  $b = 5.51190(10)$  Å,  $c = 29.0984(14)$  Å.

| Atom  | $x$        | $y$        | $z$         | $U_{\text{iso}} (\times 100, \text{\AA}^2)$ |
|-------|------------|------------|-------------|---------------------------------------------|
| Nb(1) | 0.0510(3)  | 0.2509(8)  | 0.2498(2)   | 0.0104(15)                                  |
| Bi(1) | 0          | 0.7901(5)  | 0.15930(8)  | 0.0202(8)                                   |
| Bi(2) | 0.0450(2)  | 0.2447(4)  | 0.42887(9)  | 0.0122(7)                                   |
| Bi(3) | 0.0020(2)  | 0.7509(4)  | 0.34088(10) | 0.0131(7)                                   |
| Bi(4) | 0.0480(2)  | 0.2646(4)  | 0.07119(9)  | 0.0112(7)                                   |
| Br(1) | 0.5530(3)  | 0.2492(12) | 0.0002(3)   | 0.0210(17)                                  |
| O(1)  | 0.8000(16) | 0.485(11)  | 0.3903(17)  | 0.019(5) <sup>a</sup>                       |
| O(2)  | 0.3110(15) | 0.512(11)  | 0.3931(17)  | 0.019(5)                                    |
| O(3)  | 0.8060(15) | 0.003(12)  | 0.3898(17)  | 0.019(5)                                    |
| O(4)  | 0.2880(16) | 0.004(12)  | 0.3906(18)  | 0.019(5)                                    |
| O(5)  | 0.6280(14) | 0.659(12)  | 0.316(2)    | 0.019(5)                                    |
| O(6)  | 0.6180(14) | 0.839(12)  | 0.185(2)    | 0.019(5)                                    |
| O(7)  | 0.3210(13) | -0.034(13) | 0.261(2)    | 0.019(5)                                    |
| O(8)  | 0.8660(13) | 0.004(12)  | 0.264(2)    | 0.019(5)                                    |

<sup>a</sup> A common isotropic atomic displacement parameter was refined for O(1)-O(8)

**Table S5.** Selected bond lengths (Å) and angles (°) for Bi<sub>4</sub>NbO<sub>8</sub>Br.

| Bond lengths | (Å)       | Angles           | (°)    |
|--------------|-----------|------------------|--------|
| Nb(1)-O(5)   | 2.01(5)   | O(5)-Nb(1)-O(6)  | 157(3) |
| Nb(1)-O(6)   | 2.20(7)   | O(5)-Nb(1)-O(7)  | 84(2)  |
| Nb(1)-O(7)   | 2.27(7)   |                  | 99(3)  |
|              | 1.76(7)   | O(5)-Nb(1)-O(8)  | 82(3)  |
| Nb(1)-O(8)   | 2.27(7)   |                  | 95(3)  |
|              | 1.74(7)   | O(6)-Nb(1)-O(7)  | 80(3)  |
| Bi(1)-O(1)   | 2.60(7)   |                  | 98(3)  |
| Bi(1)-O(2)   | 2.26(6)   | O(6)-Nb(1)-O(8)  | 82(3)  |
| Bi(1)-O(3)   | 2.64(7)   |                  | 97(3)  |
| Bi(1)-O(4)   | 2.36(7)   | O(7)-Nb(1)-O(7)  | 176(4) |
| Bi(1)-O(5)   | 2.49(6)   | O(7)-Nb(1)-O(8)  | 79(3)  |
| Bi(1)-O(6)   | 2.29(7)   |                  | 87(3)  |
| Bi(1)-O(7)   | 3.15(7)   |                  | 96(3)  |
| Bi(1)-O(8)   | 2.76(6)   |                  | 98(4)  |
| Bi(2)-Br(1)  | 3.391(8)  | O(8)-Nb(1)-O(8)  | 166(4) |
|              | 3.412(11) | Nb(1)-O(7)-Nb(1) | 161(4) |
|              | 3.479(11) | Nb(1)-O(8)-Nb(1) | 153(4) |
|              | 3.512(8)  |                  |        |
| Bi(2)-O(1)   | 2.19(9)   |                  |        |
| Bi(2)-O(2)   | 2.27(9)   |                  |        |
| Bi(2)-O(3)   | 2.19(8)   |                  |        |
| Bi(2)-O(4)   | 2.32(8)   |                  |        |
| Bi(3)-O(1)   | 2.42(7)   |                  |        |
| Bi(3)-O(2)   | 2.73(6)   |                  |        |
| Bi(3)-O(3)   | 2.23(7)   |                  |        |
| Bi(3)-O(4)   | 2.40(7)   |                  |        |
| Bi(3)-O(5)   | 2.21(7)   |                  |        |
| Bi(3)-O(6)   | 2.25(6)   |                  |        |
|              | 3.61(6)   |                  |        |
| Bi(3)-O(7)   | 3.10(6)   |                  |        |
| Bi(3)-O(8)   | 3.39(7)   |                  |        |
| Bi(4)-Br(1)  | 3.423(8)  |                  |        |
|              | 3.429(11) |                  |        |
|              | 3.463(8)  |                  |        |
|              | 3.472(11) |                  |        |
| Bi(4)-O(1)   | 2.22(9)   |                  |        |
| Bi(4)-O(2)   | 2.17(9)   |                  |        |
| Bi(4)-O(3)   | 2.29(8)   |                  |        |
| Bi(4)-O(4)   | 2.25(8)   |                  |        |

**Table S6.** Crystallographic data for Bi<sub>4</sub>NbO<sub>8</sub>Cl and Bi<sub>4</sub>NbO<sub>8</sub>Br.

| <b>Crystal data</b>                            |                                       |                                       |
|------------------------------------------------|---------------------------------------|---------------------------------------|
| Empirical formula                              | Bi <sub>4</sub> NbO <sub>8</sub> Cl   | Bi <sub>4</sub> NbO <sub>8</sub> Br   |
| Crystal habit (color)                          | Platelet, yellow                      | Platelet, yellow                      |
| Crystals size (μm)                             |                                       |                                       |
| Cell system, space group                       | Orthorhombic, <i>P2<sub>1</sub>cn</i> | Orthorhombic, <i>P2<sub>1</sub>cn</i> |
| Cell dimensions (Å)                            |                                       |                                       |
| <i>a</i>                                       | 5.4835(3)                             | 5.51190(10)                           |
| <i>b</i>                                       | 5.4850(3)                             | 5.51190(10)                           |
| <i>c</i>                                       | 28.682(2)                             | 29.0984(14)                           |
| Volume (Å <sup>3</sup> )                       | 862.67(10)                            | 884.04(5)                             |
| <i>Z</i>                                       | 4                                     | 4                                     |
| Temperature (K)                                | 293                                   | 293                                   |
| θ <sub>max</sub> (°)                           | 26.31                                 | 26.36                                 |
| Number of independent reflections              | 1846 [R <sub>int</sub> =0.0494]       | 1978 [R <sub>int</sub> =0.1167]       |
| No. of parameters                              | 68                                    | 54                                    |
| <i>R</i> <sub>1</sub> , <i>wR</i> <sub>2</sub> | 0.0374, 0.1000                        | 0.0850, 0.2450                        |
| <i>S</i>                                       | 1.038                                 | 1.161                                 |
